# Supplementary material for: Microbiological Contamination Prediction of River Deltas in Similar Areas and Applicability throughout Mediterranean Areas
Source: Preprints.org preprint supplement (doi:10.20944/preprints202409.0484.v1), 2024-09-06
Supplement: Supplementary file 1 [file supplementary]

## Supplementary Figures

### Microbiological contamination prediction of river deltas in similar areas and applicability throughout Mediterranean areas

Marina Lampronikou<sup>1</sup>, Konstantinos Kakavas<sup>2\*</sup>

<sup>1</sup>Department of Environmental Sciences, University of Thessaly, Larisa 41500, Thessaly, Greece; mlampronikou@uth.gr

<sup>2</sup>Department of Environmental Sciences, University of Thessaly, Larisa 41500, Thessaly, Greece; kakavas@uth.gr

\*Correspondence: kakavas@uth.gr; Tel.: 00302410684664

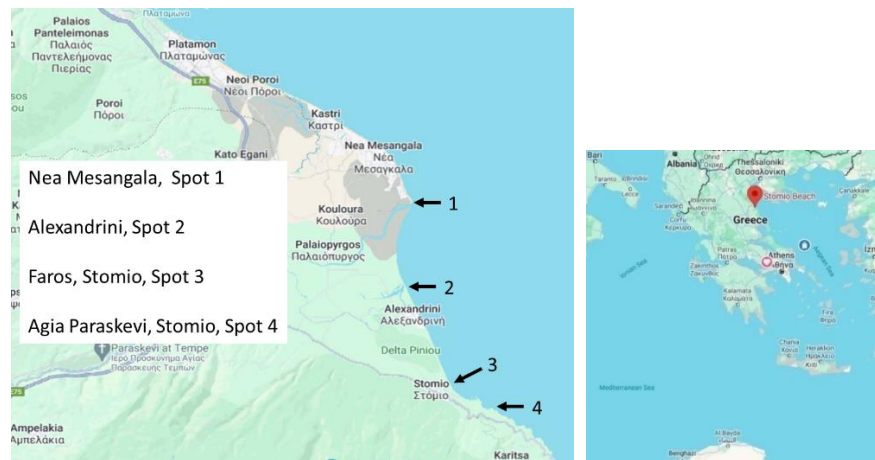

**Figure S1.** Delta area of Pineios River in Greece.

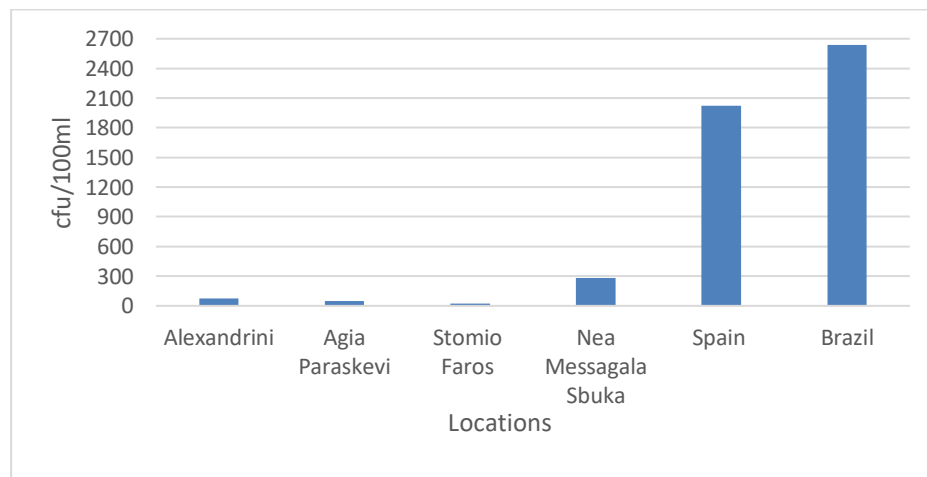

**Figure S3.** The E. coli bacteria levels in Greece, Spain and Brazil – Spring (May) of 2023.

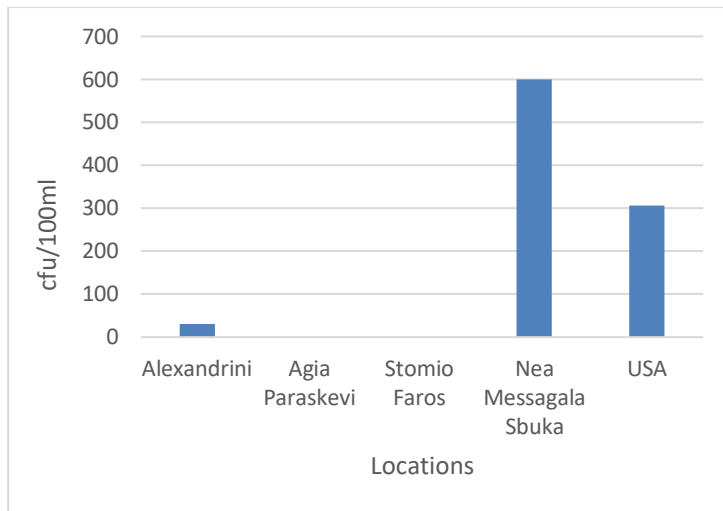

**Figure S4.** The Enterococcus bacteria levels in Greece and USA – Spring (May) of 2023.

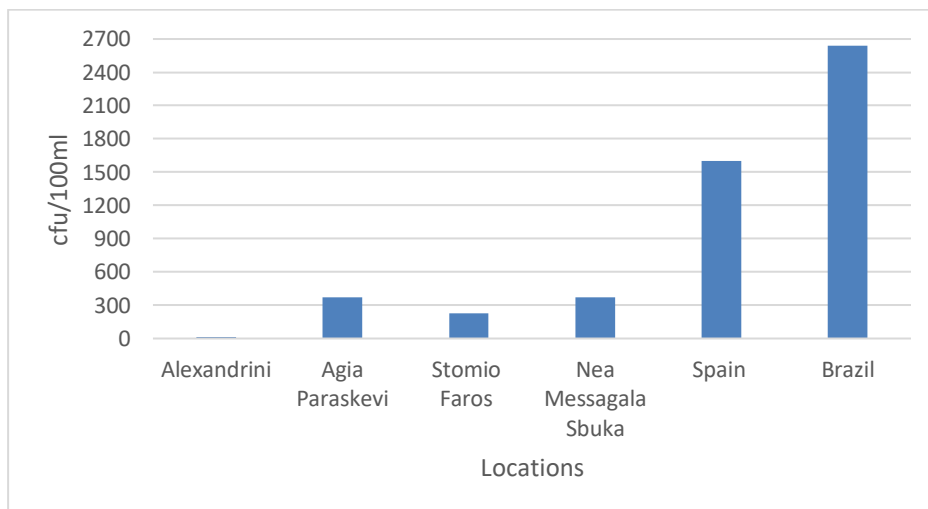

**Figure S5.** The E. coli bacteria levels in Greece, Spain and Brazil – Summer (June) of 2023.

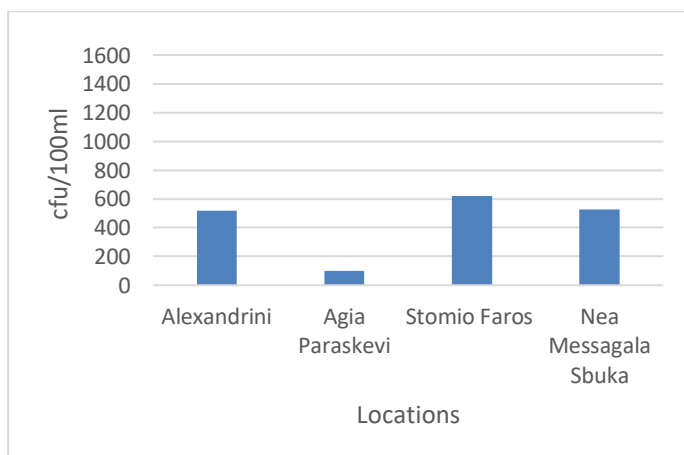

**Figure S6.** The Total coliforms bacteria levels in Greece – Autumn (November) of 2023.

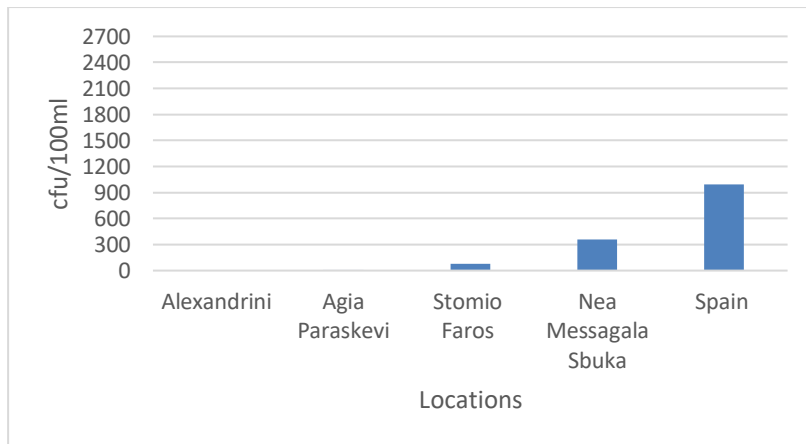

**Figure S7.** The E. Coli bacteria levels in Greece and Spain – Autumn (November) of 2023.

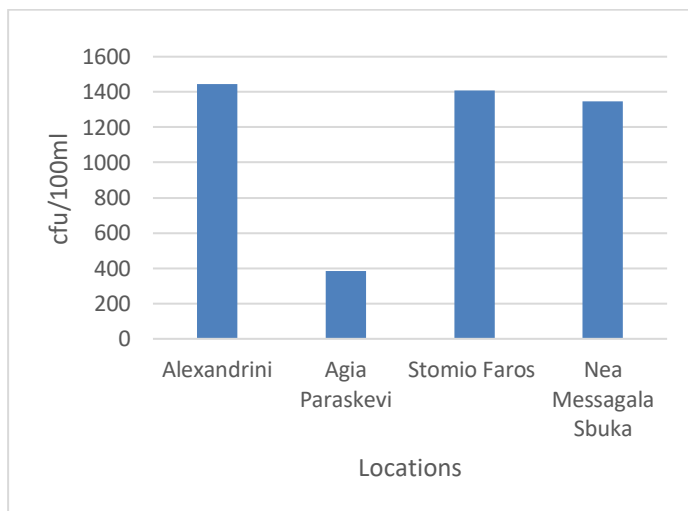

**Figure S8.** The Total coliforms bacteria levels in Greece – winter (February) of 2024.

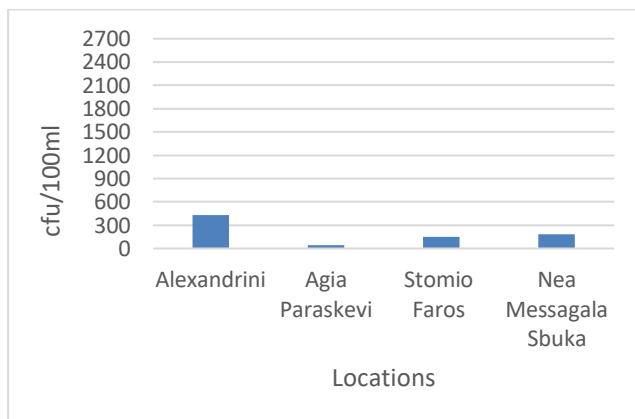

**Figure S9.** The E. Coli bacteria levels in Greece – Winter (February) of 2024.

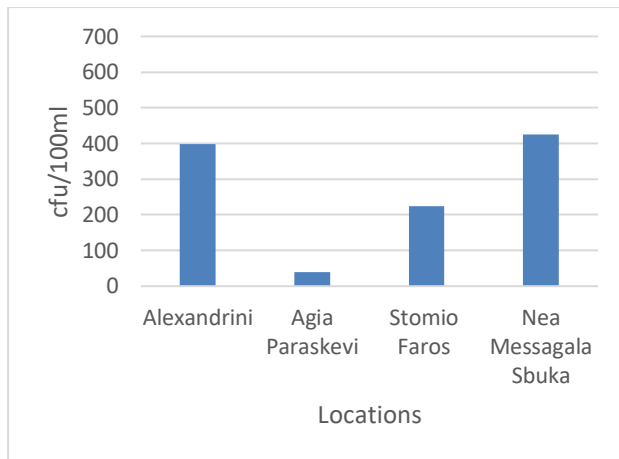

**Figure S10.** The Enterococcus bacteria levels in Greece – Winter (February) of 2024.

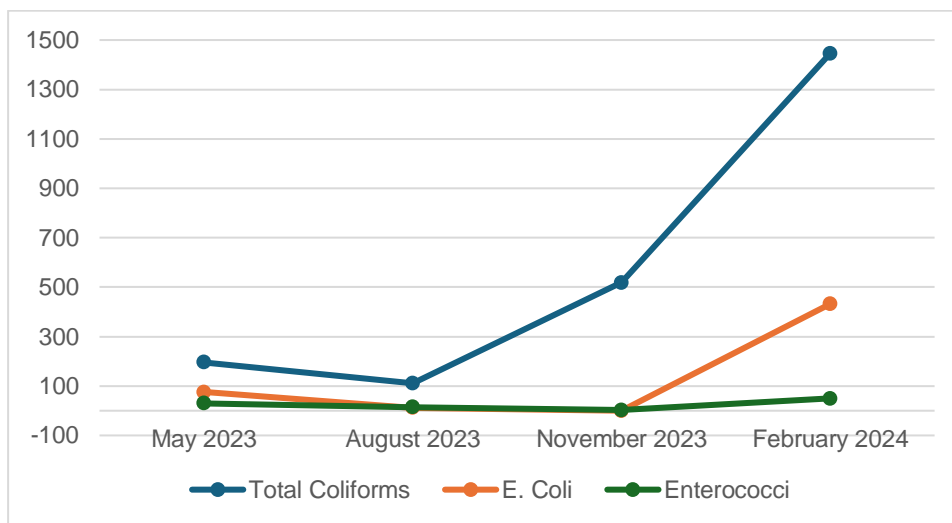

**Figure S11.** Value range of all pollution indicators over a period of one year in Alexandrini.

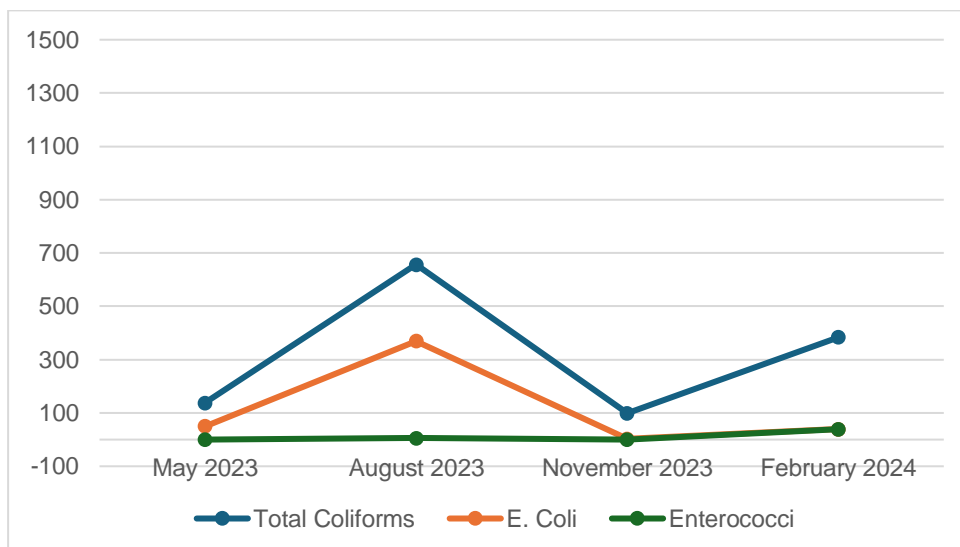

**Figure S12.** Value range of all pollution indicators over a period of one year in Agia Paraskevi.

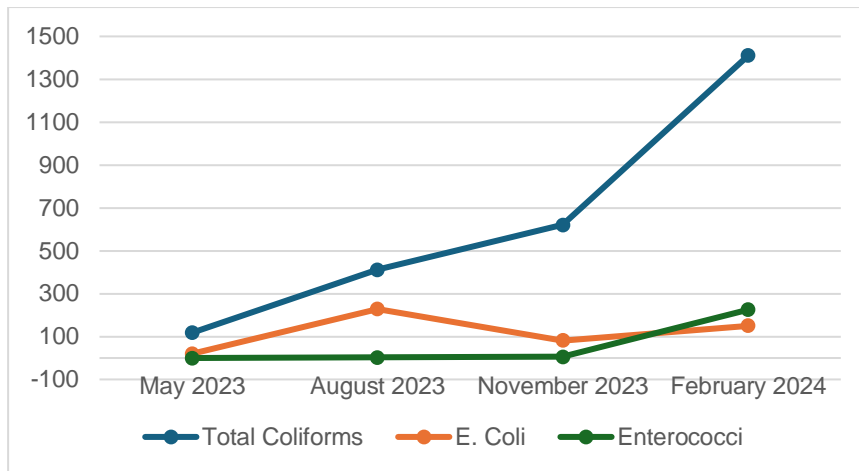

**Figure S13.** Value range of all pollution indicators over a period of one year in the Faros area in Stomio.

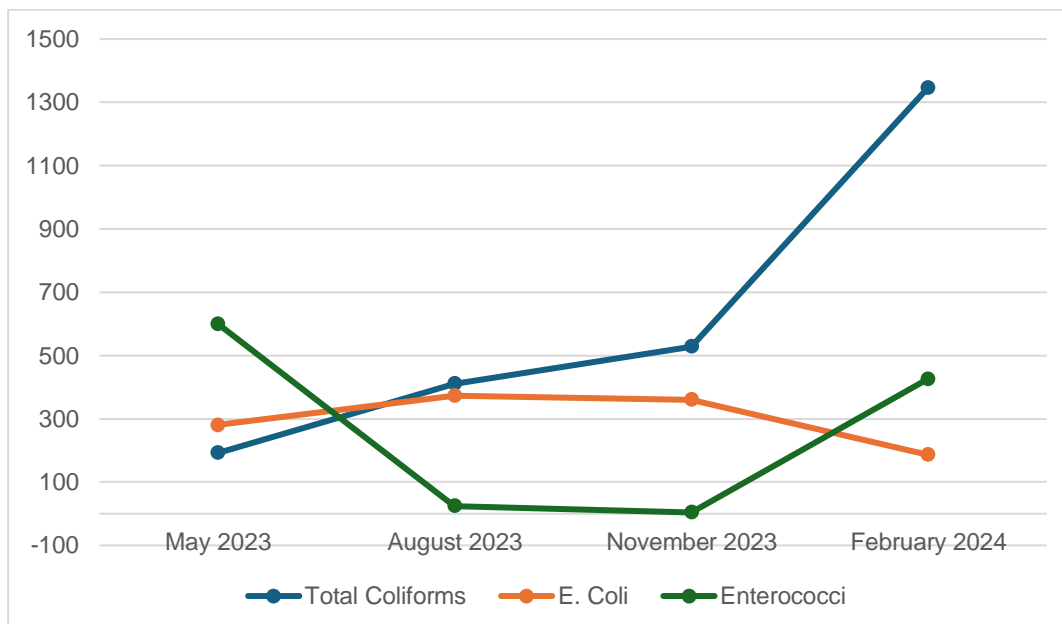

**Figure S14.** Value range of all pollution indicators over a period of one year in Nea Messagala – Sbuka Beach Bar.
