# Supplementary material for: Microbiological Contamination Prediction of River Deltas in Similar Areas and Applicability throughout Mediterranean Areas
Source: Preprints.org preprint supplement (doi:10.20944/preprints202409.0484.v1), 2024-09-06
Supplement: Supplementary file 2 [file supplementary]

## Supplementary Tables

### Microbiological contamination prediction of river deltas in similar areas and applicability throughout Mediterranean areas

Marina Lampronikou<sup>1</sup>, Konstantinos Kakavas<sup>2\*</sup>

<sup>1</sup>Department of Environmental Sciences, University of Thessaly, Larisa 41500, Thessaly, Greece; mlampronikou@uth.gr

<sup>2</sup>Department of Environmental Sciences, University of Thessaly, Larisa 41500, Thessaly, Greece; kakavas@uth.gr

\*Correspondence: kakavas@uth.gr; Tel.: 00302410684664

**Table S1: Limits of bathing water parameters in accordance with Directive 2006/7/EC**

| Parameter                   | Excellent quality<br>(in 95% of the<br>samples) | Good quality (in<br>95% of the<br>samples) | Sufficient quality<br>(in 90% of the<br>samples) |
|-----------------------------|-------------------------------------------------|--------------------------------------------|--------------------------------------------------|
| E. Coli<br>(cfu/100ml)      | 250                                             | 500                                        | 500                                              |
| Enterococcus<br>(cfu/100ml) | 100                                             | 200                                        | 185                                              |

**Table S2: Council Directive 76/160/EEC concerning the quality of bathing water (Water Framework Directive (2000/60/EC)).**

| Parameter              | Desirable limit<br>(cfu/100ml) | Maximum limit<br>(cfu/100ml) |
|------------------------|--------------------------------|------------------------------|
| <i>Total coliforms</i> | 500                            | 10,000                       |
| <i>Fecal coliforms</i> | 100                            | 2,000                        |
| <i>E. Coli</i>         | 250                            | 500                          |
| <i>Enterococcus</i>    | 100                            | 200                          |

| Dates of sample collection                 |  | Type of bacterium                      | Alexandrini | Agia Paraskevi – Stomio | Faros – Stomio | Nea Mesangala |
|--------------------------------------------|--|----------------------------------------|-------------|-------------------------|----------------|---------------|
| Spring<br>May<br>16 <sup>th</sup> 2023     |  | <i>Total Coliforms</i><br>(cfu/100ml)  | 196         | 138                     | 118            | 192           |
|                                            |  | <i>E. coli</i><br>(cfu/100ml)          | 76          | 50                      | 20             | 280           |
|                                            |  | <i>Enterococcus</i><br>(cfu/100ml)     | 30          | 0                       | 0              | 600           |
| Summer<br>August<br>21 <sup>st</sup> 2023  |  | <i>Total Coliforms</i><br>(cfu/100ml)  | 111         | 657                     | 411            | 411           |
|                                            |  | <i>E. coli</i><br>(cfu/100ml)          | 12          | 369                     | 228            | 373           |
|                                            |  | <i>Enterococcus</i><br>(cfu/100ml)     | 15          | 6                       | 3              | 24            |
| Autumn<br>November 6 <sup>th</sup><br>2023 |  | <i>Total Coliforms</i><br>(cfu/ 100ml) | 519         | 99                      | 621            | 528           |
|                                            |  | <i>E. coli</i><br>(cfu/100ml)          | 0           | 3                       | 81             | 360           |
|                                            |  | <i>Enterococcus</i><br>(cfu/100ml)     | 3           | 0                       | 6              | 4             |
| Winter<br>February 28 <sup>th</sup> 2024   |  | <i>Total Coliforms</i><br>(cfu/100ml)  | 1446        | 384                     | 1410           | 1347          |
|                                            |  | <i>E. coli</i><br>(cfu/100ml)          | 432         | 39                      | 150            | 186           |
|                                            |  | <i>Enterococcus</i><br>(cfu/100ml)     | 399         | 39                      | 225            | 426           |

**Table S3: Results of the microbiological analyses carried out for the study areas in Greece.**

**Table S4: Mann – Whitney Test before and after the flood events.**

|                                | E. coli           | Enterococcus      |
|--------------------------------|-------------------|-------------------|
| Mann–Whitney U                 | 33,500            | 47,000            |
| Wilcoxon W                     | 111,500           | 83,000            |
| Z                              | -1,120            | -,077             |
| Asymp. Sig. (2-tailed)         | ,263*             | ,938 <sup>#</sup> |
| Exact Sig. [2*(1-tailed Sig.)] | ,270 <sup>b</sup> | ,970 <sup>b</sup> |

\* $P=0,263>0,05$ , \* $P=0,938>0,05$ , b: Not corrected for ties.

**Table S5: Mann – Whitney Test for all points in Greece and Spain, for either of the two pathogenic bacteria.**

|                | E. coli                   |                                             |                             |                                |                       | Enterococcus                                |                             |                                |
|----------------|---------------------------|---------------------------------------------|-----------------------------|--------------------------------|-----------------------|---------------------------------------------|-----------------------------|--------------------------------|
|                | Alexan<br>drini–<br>Spain | Agia<br>Paraske<br>vi –<br>Stomio<br>–Spain | Faros –<br>Stomio<br>–Spain | Nea<br>Mesang<br>ala–<br>Spain | Alexandr<br>ini–Spain | Agia<br>Paraske<br>vi –<br>Stomio<br>–Spain | Faros –<br>Stomio<br>–Spain | Nea<br>Mesang<br>ala–<br>Spain |
| Mann–Whitney U | 4,500                     | 4,500                                       | 5,000                       | 5,000                          | 6,500                 | 3,000                                       | 5,000                       | 10,000                         |

|                                |                   |                   |                   |                   |                   |                   |                   |                   |
|--------------------------------|-------------------|-------------------|-------------------|-------------------|-------------------|-------------------|-------------------|-------------------|
| Wilcoxon W                     | 19,500            | 19,500            | 20,000            | 20,000            | 21,500            | 18,000            | 20,000            | 25,000            |
| Z                              | -1,353            | -1,353            | -1,225            | -1,225            | -1,588            | -2,216            | -1,843            | -,923             |
| Asymp. Sig. (2-tailed)         | ,176*             | ,176*             | ,221*             | ,221*             | ,112*             | ,027*             | ,065*             | ,356*             |
| Exact Sig. [2*(1-tailed Sig.)] | ,190 <sup>b</sup> | ,190 <sup>b</sup> | ,286 <sup>b</sup> | ,286 <sup>b</sup> | ,126 <sup>b</sup> | ,030 <sup>b</sup> | ,082 <sup>b</sup> | ,429 <sup>b</sup> |

---

\*P=0.176>0.05, \*P=0.221>0.05, \*P=0.112>0.05, \*P=0.027<0.05, \*P=0.065>0.05, \*P=0.356>0.05, b: Not corrected for ties.
